# Supplementary material for: Comparison of Synthetic vs. Biogenic Polymeric Process-Directing Agents for Intrafibrillar Mineralization of Collagen
Source: Polymers (Basel). 2022 Feb 16;14(4):775. doi: 10.3390/polym14040775 (PMC8879695; doi:10.3390/polym14040775)
Supplement: Supplementary file 1 [file polymers-14-00775-s001.zip]

Archive with 4 entries (4 files):
- polymers-1588747-supplementary.pdf
- Vdieo S1-OPN.wmv
- Video S2-pAsp.wmv
- Video S3-Conv.wmv
